# Supplementary material for: Crystal structure of the middle and C-terminal domains of Hsp90α labeled with a coumarin derivative reveals a potential allosteric binding site as a drug target
Source: PubMed Central journal article supplement (PMC9063849; doi:10.1107/s2059798322002261), 2022-04-08
Supplement: d-78-00571-sup1.pdf [file d-78-00571-sup1.pdf]

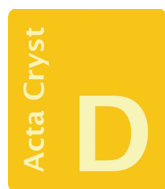

STRUCTURAL  
BIOLOGY

**Volume 78 (2022)**

**Supporting information for article:**

**Crystal structure of the middle and C-terminal domains of Hsp90 $\alpha$  labeled with a coumarin derivative reveals a potential allosteric binding site as a drug target**

**Shuxia Peng, Jeff Woodruff, Prabhat Kumar Pathak, Robert L. Matts and Junpeng Deng**

**Table S1** DLS analysis of the oligomeric states of Hsp90 $\alpha$ MC, Hsp90 $\alpha$ M, Hsp90 $\alpha$ C, and Hsp90 $\alpha$  FL proteins with inhibitors

| Protein            | +              | Z-Ave (nm)   | MW (kDa)            | Oligomeric state                     |
|--------------------|----------------|--------------|---------------------|--------------------------------------|
| Hsp90 $\alpha$ MC  | Buffer         | 11.8+/-3.2   | 213.3+/-58.8        | Tetramer<br>(Dimer-Tetramer-Hexamer) |
|                    | DMSO           | 11.8+/-4.4   | 216+/-80.2          | Tetramer<br>(Dimer-Tetramer-Hexamer) |
|                    | Chlorobiocin   | 27.1+/-13.4  | 1500+/-745.5        | Oligomer                             |
|                    | Coumermycin A1 | 16.8+/-4.9   | 452.3+/-137.8       | Hexamer                              |
|                    | Derrubone      | 13.8+/-4.6   | 308.3+/-103.8       | Hexamer                              |
|                    | MDCC           | 13.5+/-3.8   | 292.7+/-82.3        | Hexamer                              |
| Hsp90 $\alpha$ M   | Buffer         | 6.4+/-1.6    | 51.8+/-13.3         | Monomer                              |
|                    | DMSO           | 6.7+/-2.2    | 56.2+/-18.5         | Monomer                              |
|                    | Chlorobiocin   | 6.7+/-2.0    | 58.7+/-17.3         | Monomer                              |
|                    | Coumermycin A1 | 6.7+/-1.9    | 56.7+/-15.8         | Monomer                              |
|                    | Derrubone      | 7.8+/-3.0    | 82.3+/-31.2         | Monomer-Dimer                        |
|                    | MDCC           | 6.2+/-1.0    | 46.8+/-7.9          | Monomer                              |
| Hsp90 $\alpha$ C   | Buffer         | 9.1+/-3.0    | 117.7+/-38.2        | Tetramer                             |
|                    | DMSO           | 12.9+/-4.2   | 265.6+/-86.4        | Hexamer to Dodecamer                 |
|                    | Chlorobiocin   | 14.8+/-5.9   | 364.0+/-57.7        | Dodecamer/Oligomer                   |
|                    | Coumermycin A1 | 17.4+/-5.5   | 533.5+/-383.7       | Oligomer                             |
|                    | Derrubone      | 15.7+/-7.4   | 416.6+/-307.9       | Oligomer                             |
|                    | MDCC           | 167.6+/-40.0 | 1.06E5+/-<br>2.54E4 | Oligomer/Polymerized                 |
| Hsp90 $\alpha$ _FL | Buffer         | 15.7+/-3.3   | 415.8+/-89.1        | Hexamer                              |
|                    | DMSO           | 20.3+/-9.4   | 757.4+/-499.5       | Hexamer to Dodecamer                 |
|                    | Chlorobiocin   | 19.9+/-4.4   | 727.0+/-160.4       | Hexamer to Dodecamer                 |
|                    | Coumermycin A1 | 18.3+/-5.0   | 595.3+/-162.8       | Hexamer to Dodecamer                 |
|                    | Derrubone      | 19.0+/-5.7   | 651.4K+/-<br>195.7K | Hexamer to Dodecamer                 |
|                    | MDCC           | 25.5+/-11.8  | 1300+/-599.6        | Oligomer/Polymerized                 |

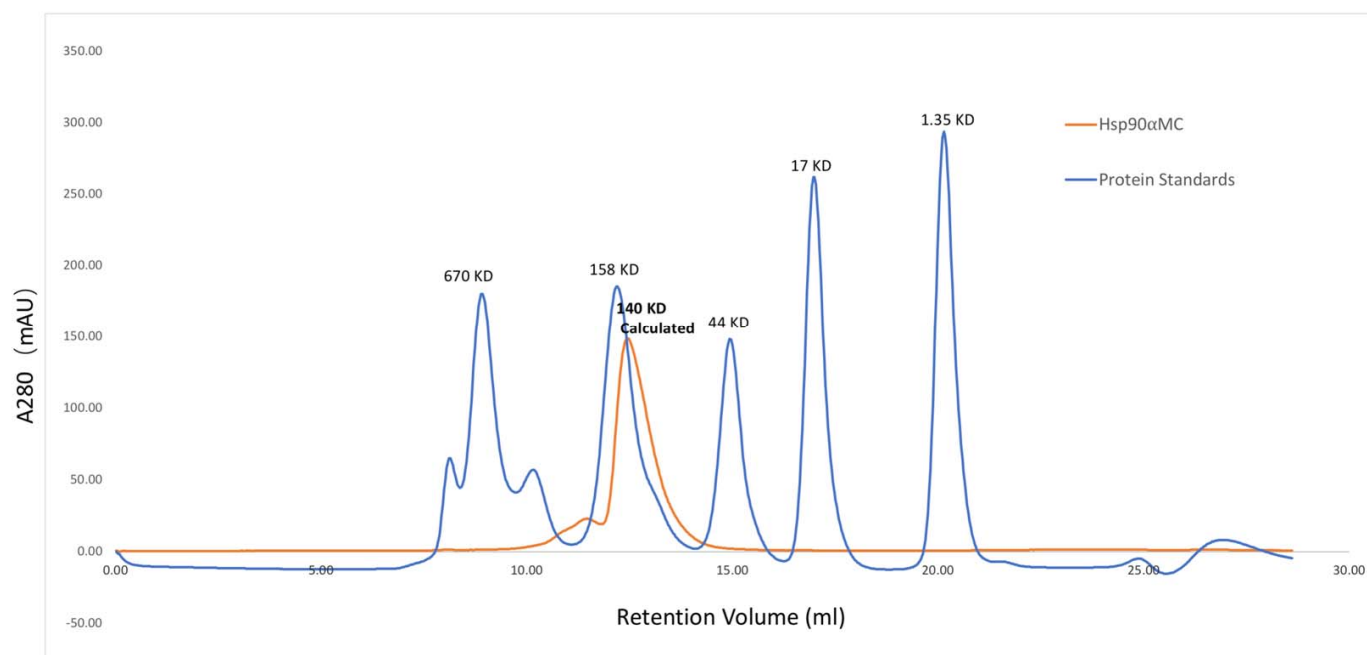

**Figure S1** SEC chromatograph of Hsp90 $\alpha$ MC protein. The calculated MW of Hsp90 $\alpha$ MC is 140 kDa, representing a homodimer.

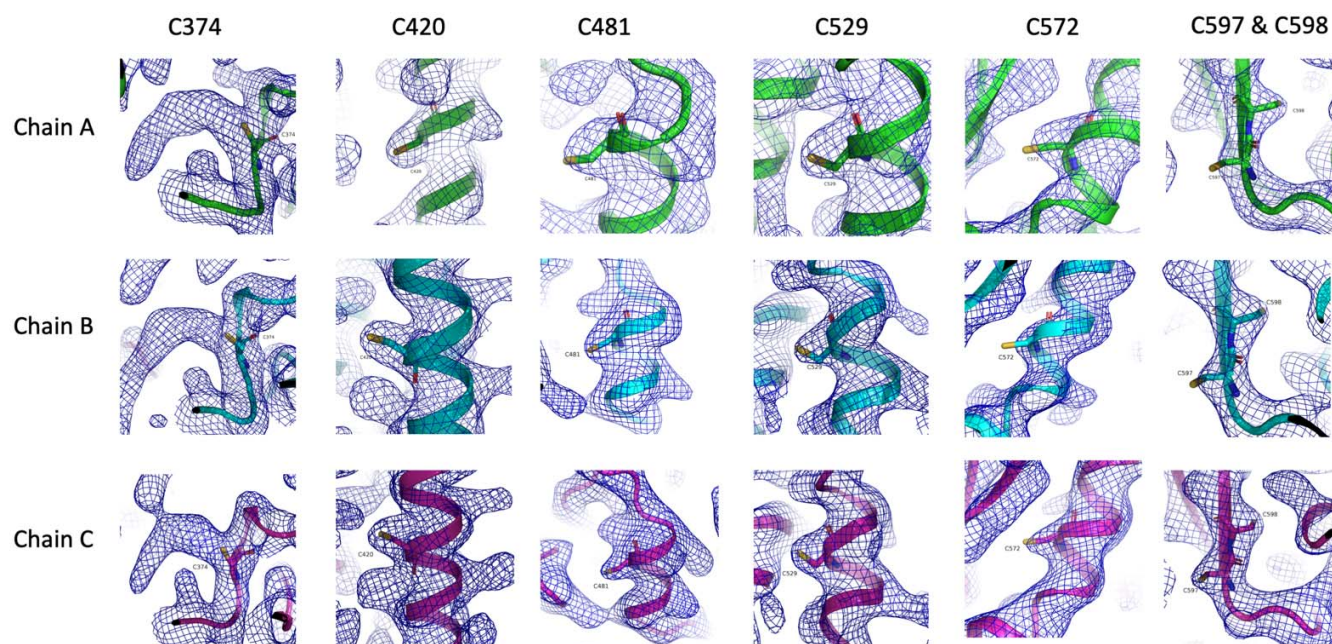

**Figure S2** The local electron density maps ( $2mF_o-DFc$  map, contour level of  $1.0 \sigma$ ) of all cystines in the crystal structure of chain A (green), chain B (cyan) and chain C (magenta).

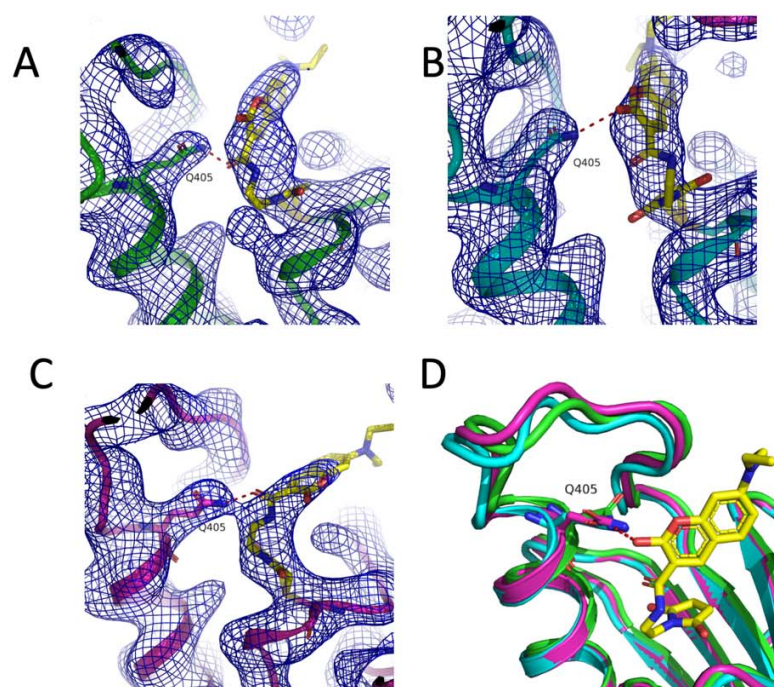

**Figure S3** The local electron density maps (2mFo-DFc map, contour level of 1.0  $\sigma$ ) of residue Q405 of Hsp90 $\alpha$  involved in H-bonding with MDCC in the crystal structure. A, chain A (green), B, chain B (cyan), C, chain C (magenta). (D) Structural alignment of Q405 in the three molecules.

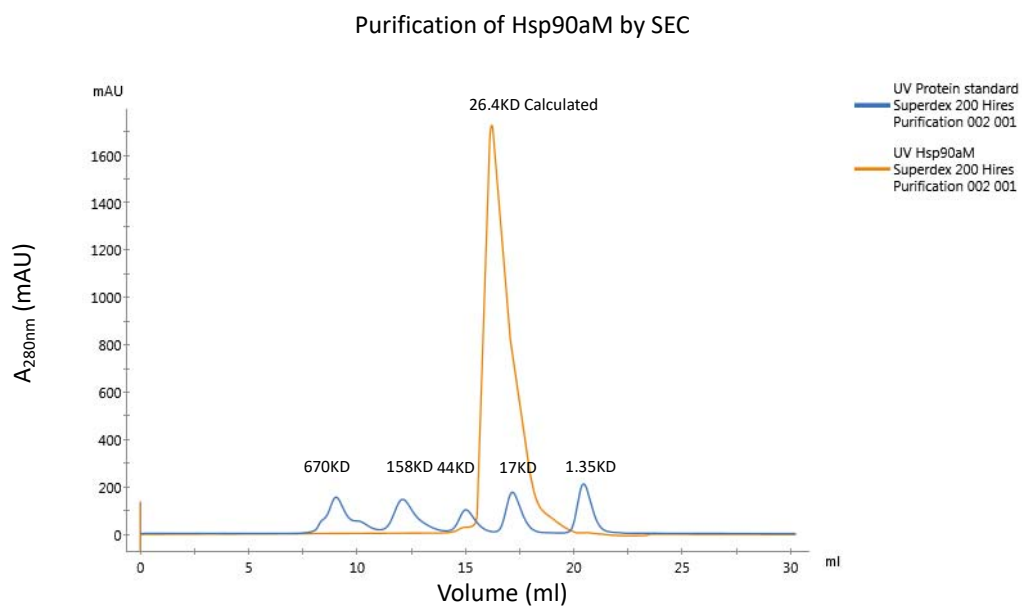

**Figure S4** SEC chromatograph of Hsp90 $\alpha$ M protein. The calculated MW of Hsp90 $\alpha$ M is 26.4 kDa), representing a monomer.

Purification of Hsp90 $\alpha$ C by SEC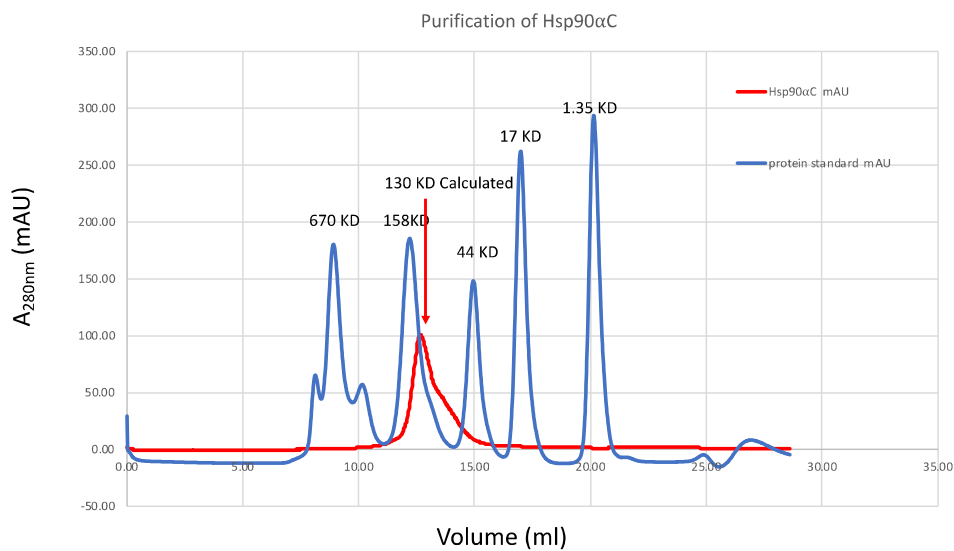

**Figure S5** SEC chromatograph of Hsp90 $\alpha$ C protein. The calculated MW of Hsp90 $\alpha$ C is 130 kDa (theoretical MW: 31.0 kDa), representing a tetramer.





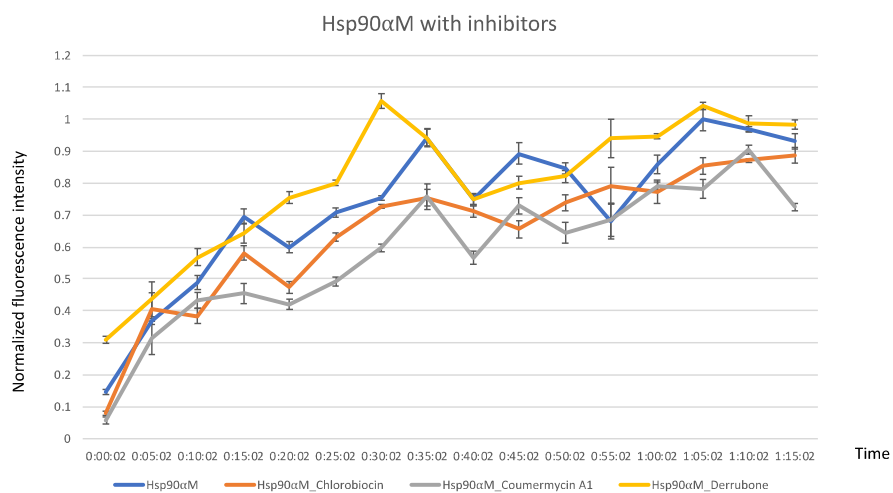

**Figure S7** Fluorescence based competition assay. Various coumarin-core containing inhibitors were pre-incubated with Hsp90 $\alpha$ M protein before adding MDCC, whose fluorescence intensity is monitored over time.

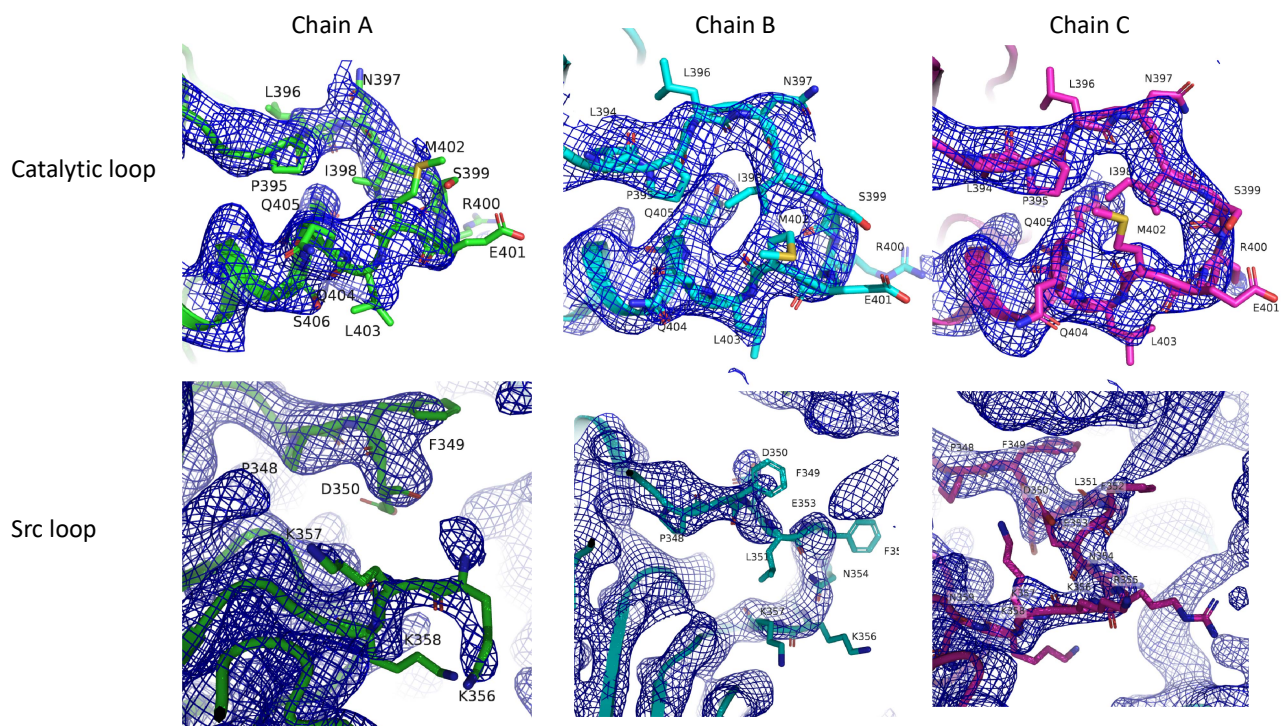

**Figure S8** The local electron density maps (2mFo-DFc map, contour level of 1.0  $\sigma$ ) of the catalytic and src loops in the crystal structure of chain A (green), chain B (cyan) and chain C (magenta).

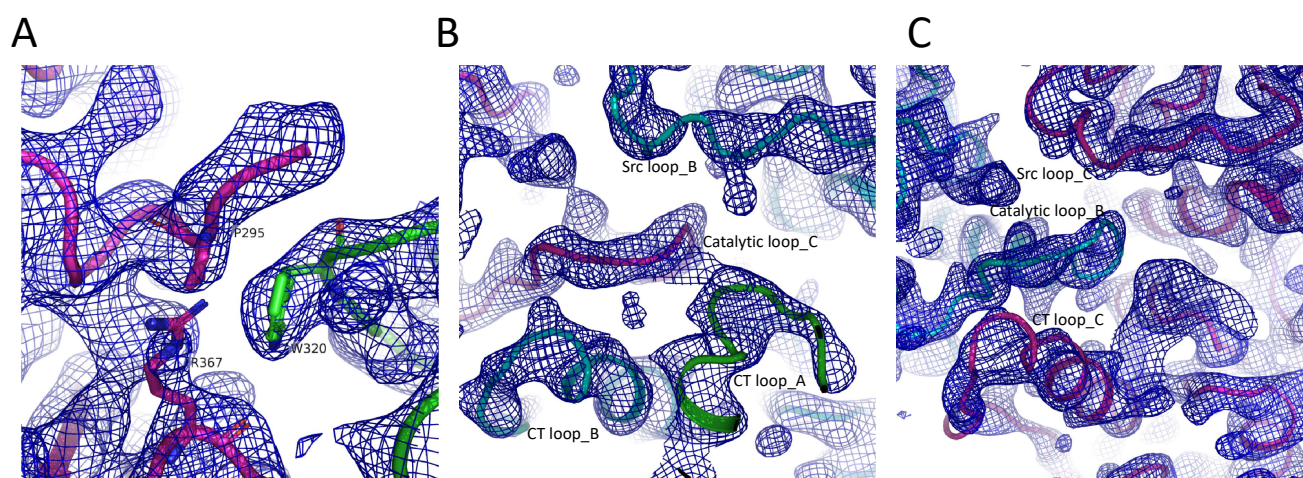

**Figure S9** The local electron density maps (2mFo-DFc map, contour level of 1.0  $\sigma$ ) of hexameric interface, where molecule C interacts with molecules A and B. (chain A, green; chain B, cyan; chain C, magentas). (A) Hydrophobic association of P295 and R367 in molecule C with W320 in molecule A; (B) The catalytic loop in molecule C interacts with the Src and CT loops in molecule B, as well as the CT loop in molecule A; (C) The Src loop and CT loop in molecule C interact with the catalytic loop in molecule B.
